# Supplementary material
Source: MDPI journal article supplement (https://www.mdpi.com/1996-1073/15/2/622)
Supplement: s1 [file s1]

---

**Supplementary Material**

**For**

**Comprehensive Analysis of the Pollutant  
Characteristics of Gasoline Vehicle Emissions  
under Different Engine, Fuel, and Test Cycles**

**Zongyan Lv <sup>1</sup>, Lei Yang <sup>1</sup>, Lin Wu <sup>1,\*</sup>, Jianfei Peng <sup>1</sup>, Qijun Zhang <sup>1</sup>, Meng Sun <sup>2</sup>,  
Hongjun Mao <sup>1,\*</sup> and Jie Min <sup>3</sup>**

<sup>1</sup> Tianjin Key Laboratory of Urban Transport Emission Research, College of Environmental Science and Engineering, Nankai University, Tianjin 300071, China; 15804065543@163.com (Z.L.); 15902251605@163.com (L.Y.); pengjianfeipku@163.com (J.P.); zhangqijun@nankai.edu.cn (Q.Z.)

<sup>2</sup> Tianjin Eco-Environmental Monitoring Center, Tianjin 300071, China; sunm1127@163.com

<sup>3</sup> Tianjin SwARC Automotive Research Laboratory Co., Ltd., Tianjin 300071, China; jie.min@swarc.com.cn

\* Correspondence: wulin@Nankai.edu.cn (L.W.); hongjunm@Nankai.edu.cn (H.M.);  
Tel.: +86-22-18630810590 (L.W.); +86-22-186022187891 (H.M.)

**Summary of Supplementary information:**

[9 Figures and 1 Table]

[10 Pages]

## 2.3. Test Cycle

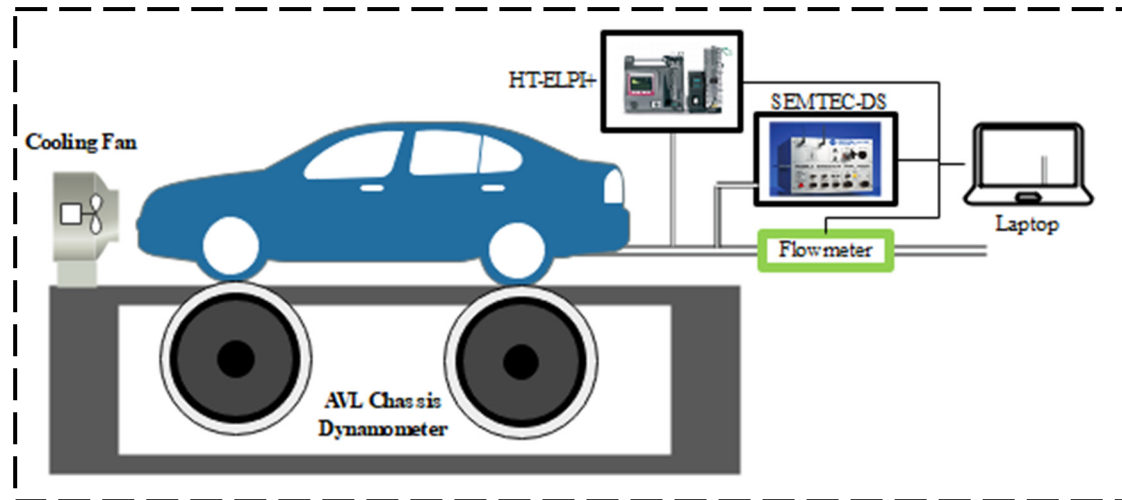

**Figure S1.** Schematic diagram of the test system.

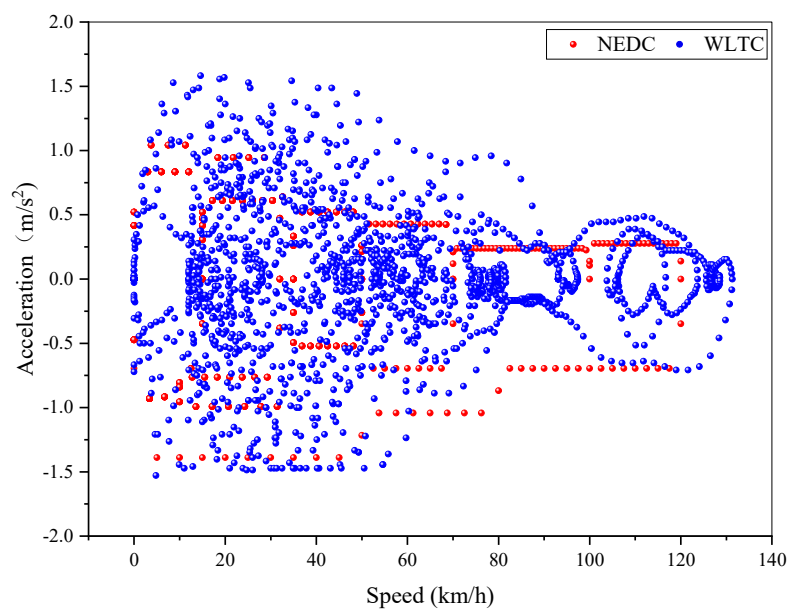

**Figure S2.** Acceleration VS vehicle speed for the NEDC and WLTC test cycles.

### 3.1. Engine Performance of Test Vehicles

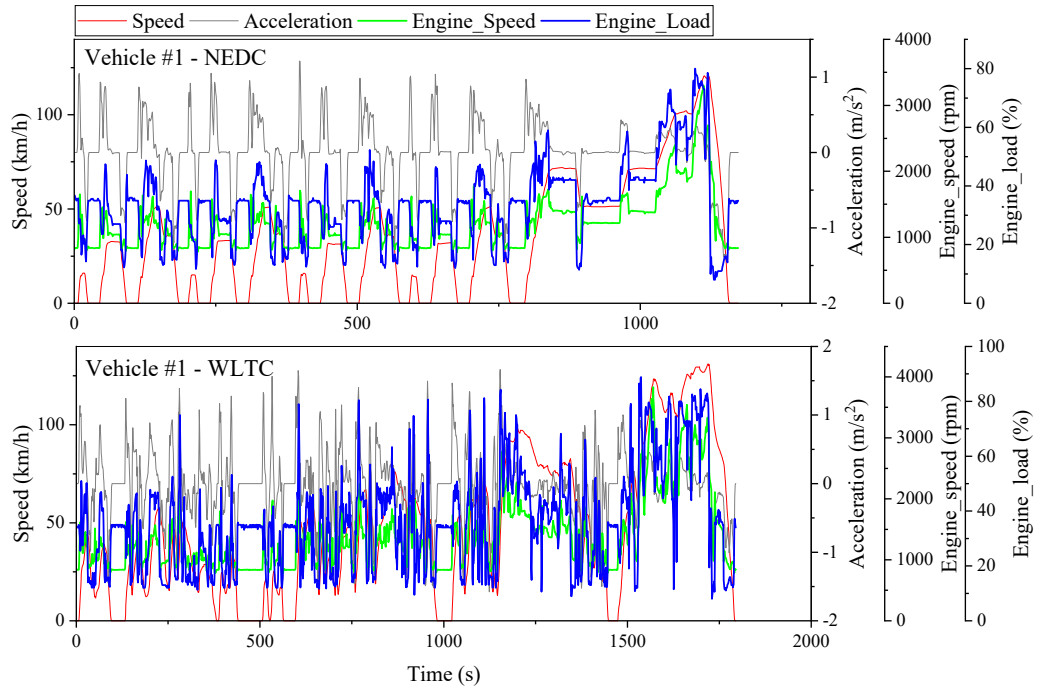

(a) Vehicle #1

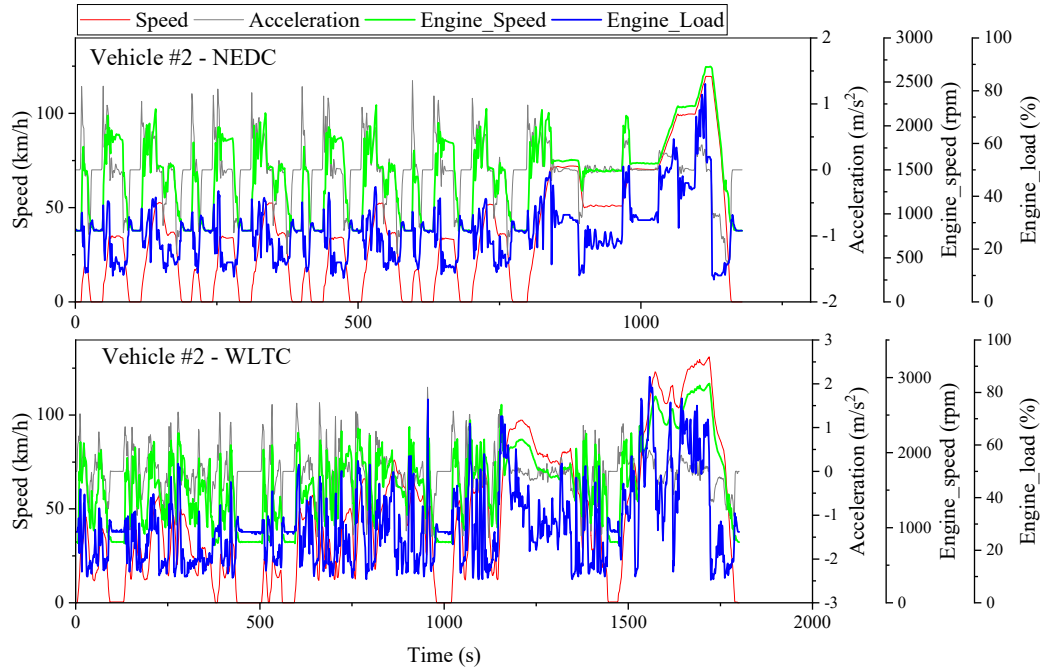

(b) Vehicle #2

**Figure S3.** Time-solved profiles of vehicle' speed, acceleration, and corresponding engine' speed, load.

### 3.2. CO<sub>2</sub> Emissions and Fuel Economy

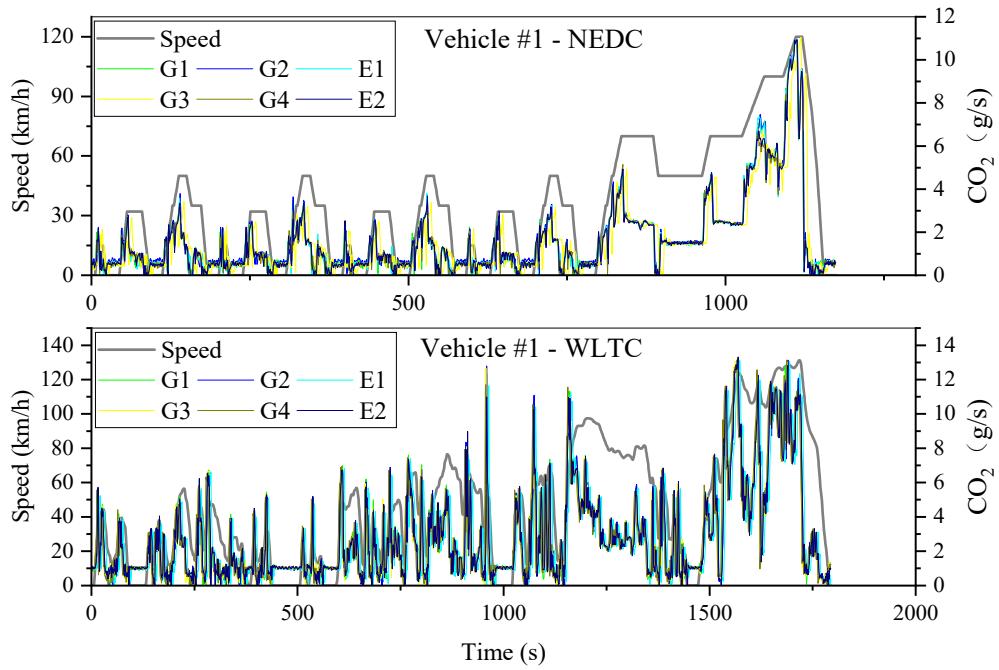

(a) Vehicle #1

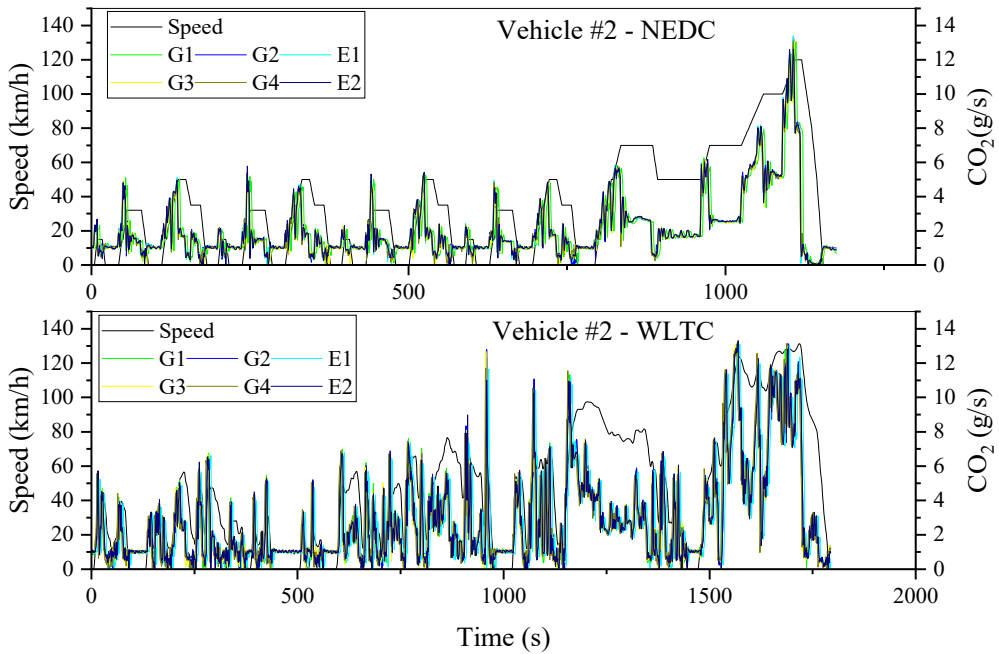

(b) Vehicle #2

**Figure S4.** Time evolution of the CO<sub>2</sub> during the test cycles with eight different test fuels of the two vehicles.

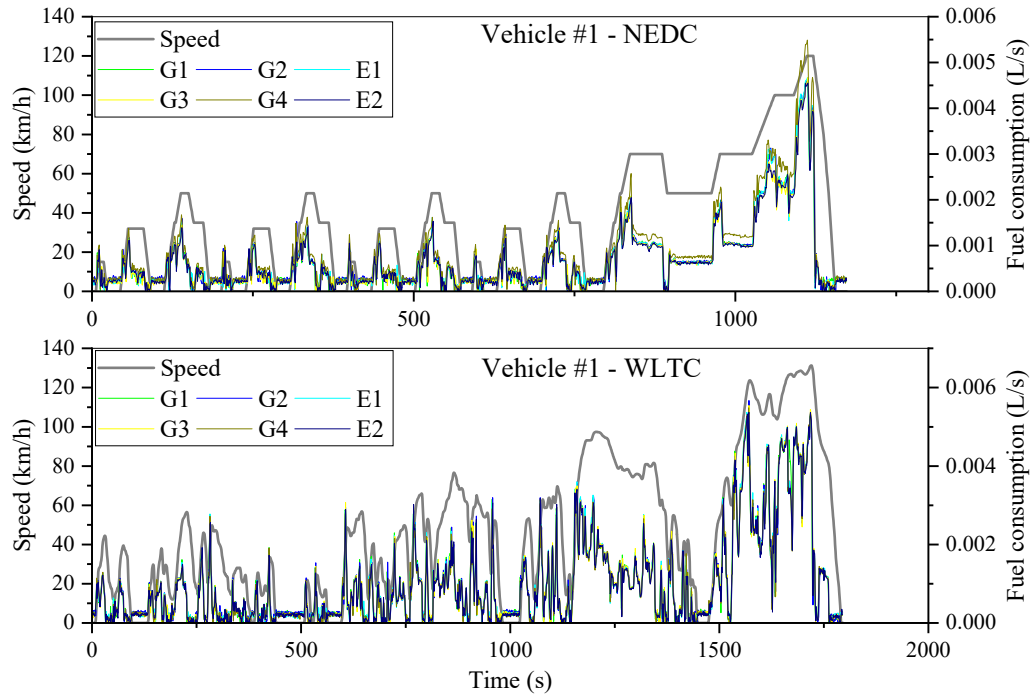

(a) Vehicle #1

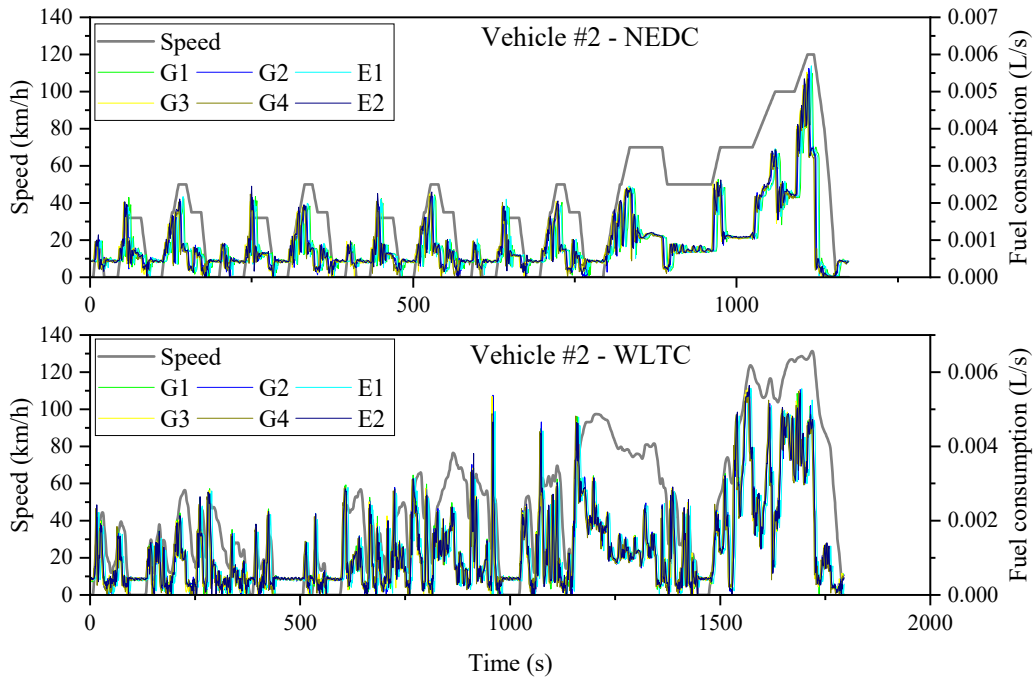

(b) Vehicle #2

**Figure S5.** Time evolution of the instantaneous fuel consumption rate during the test cycles with eight different test fuels of the two vehicles.

### 3.3. CO and NO<sub>x</sub> Emissions

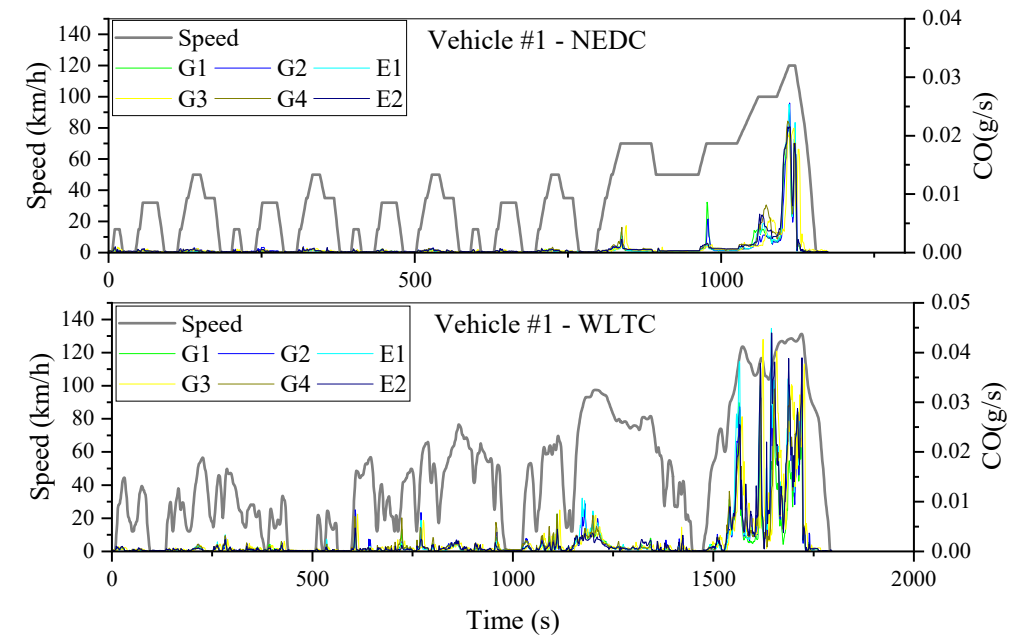

(a) vehicle #1

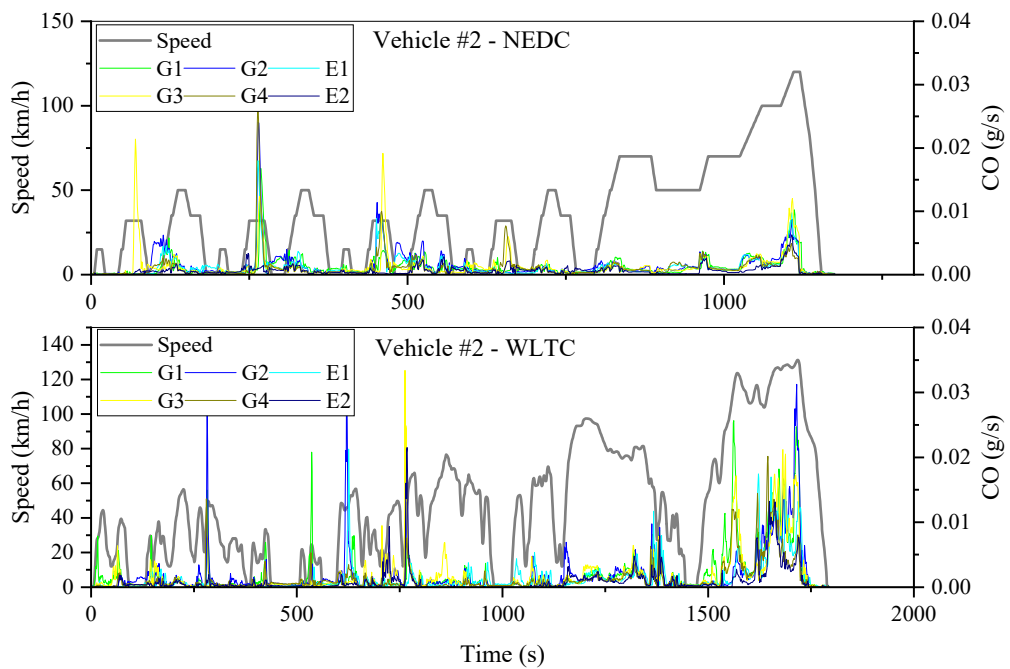

(b) Vehicle #2

**Figure S6.** Time evolution of the CO during the test cycles with eight different test fuels of the two vehicles.

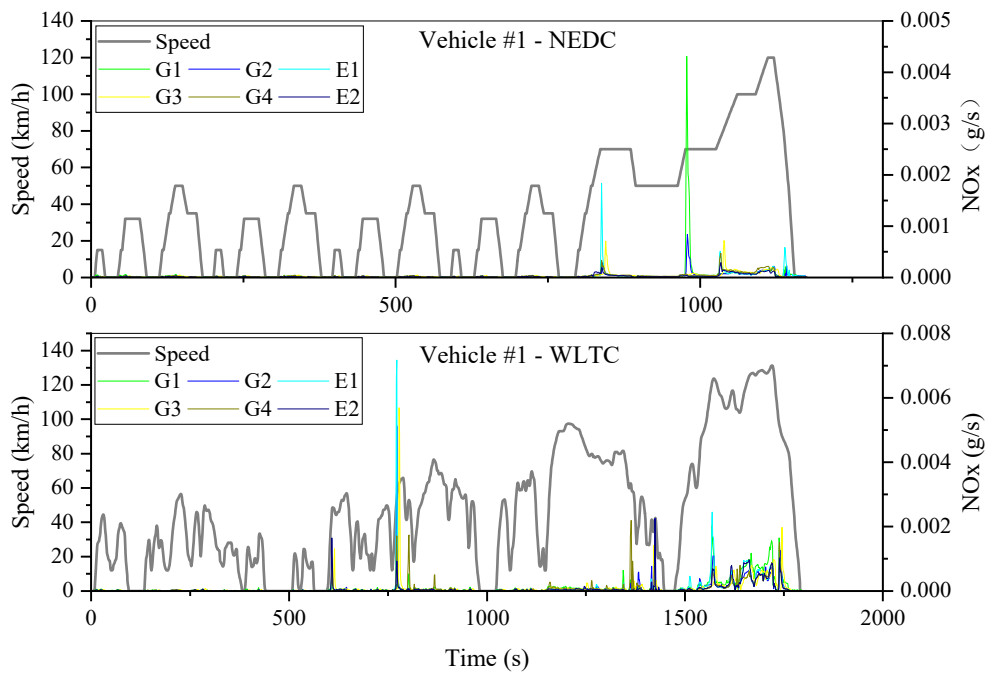

(a) Vehicle #1

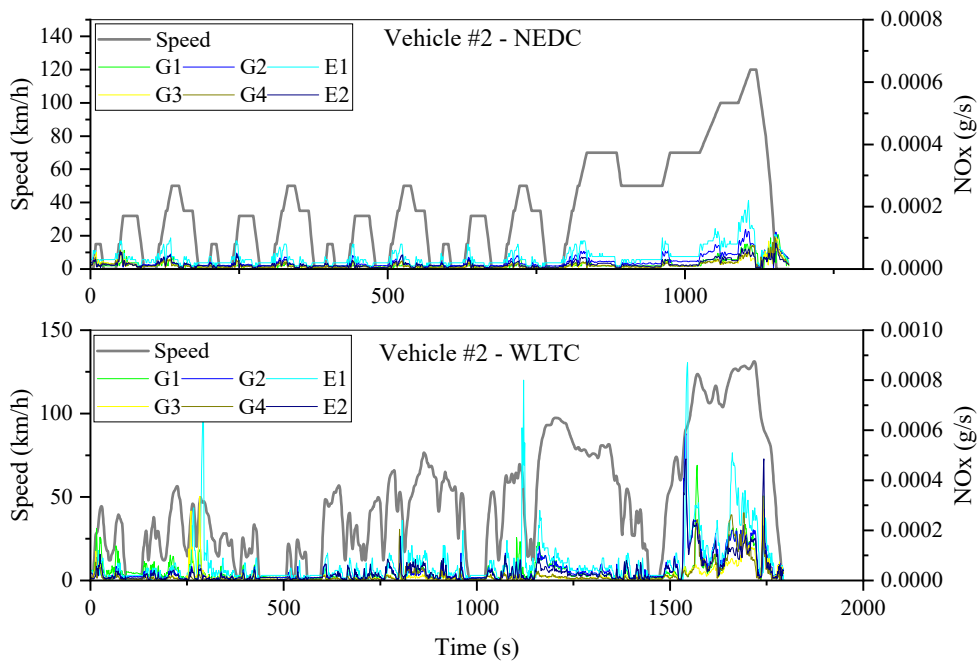

(b) Vehicle #2

**Figure S7.** Time evolution of the NO<sub>x</sub> during the test cycles with eight different test fuels of the two vehicles.

### 3.4. Particle Number Emission

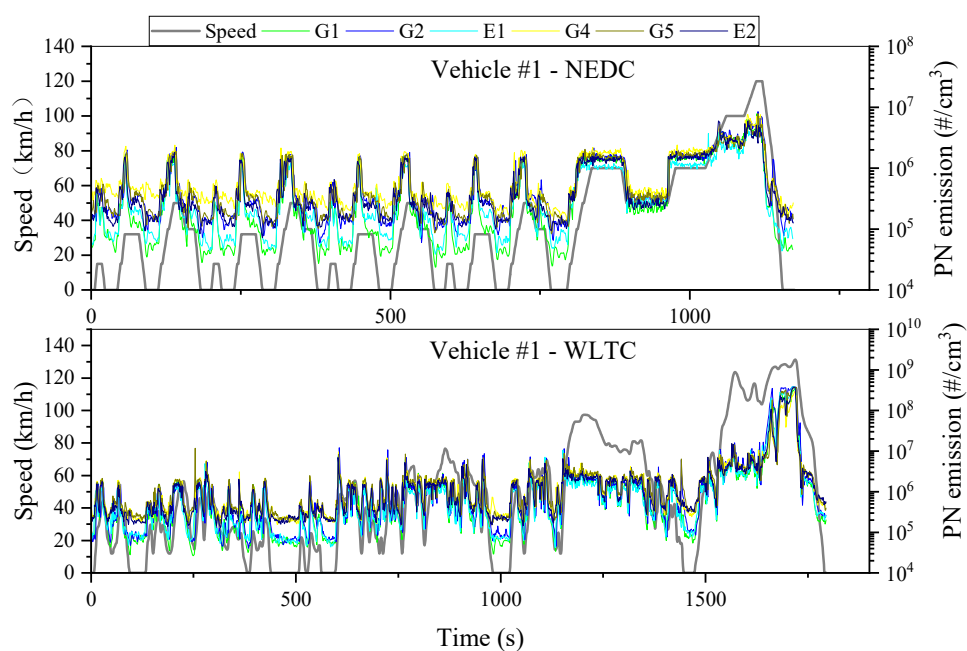

(a) Vehicle #1

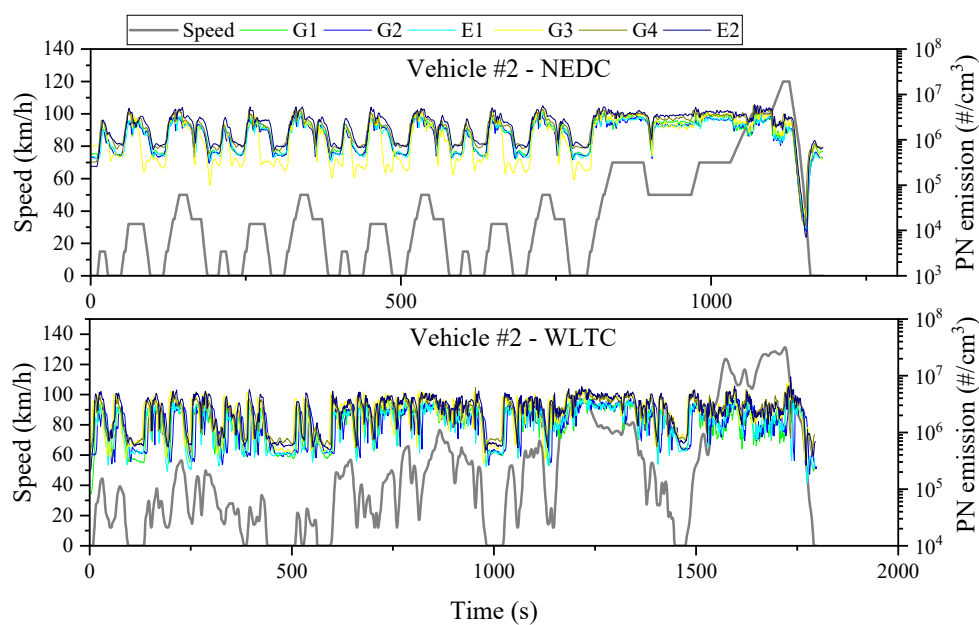

(b) Vehicle #2

**Figure S8.** Instantaneous particle number concentration from the two vehicles during the NEDC and WLTC with different fuels.



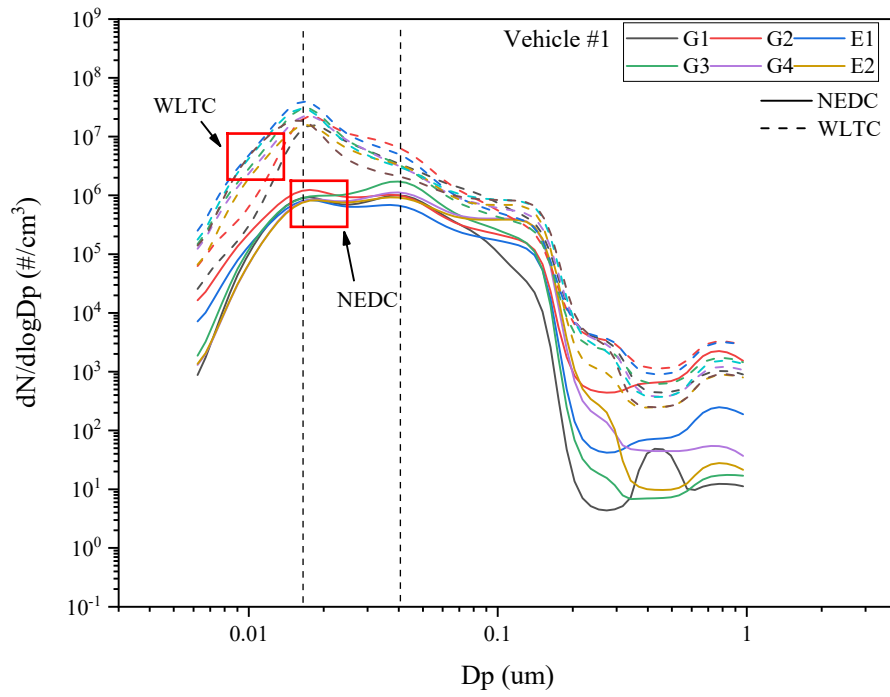

(a) Vehicle #1

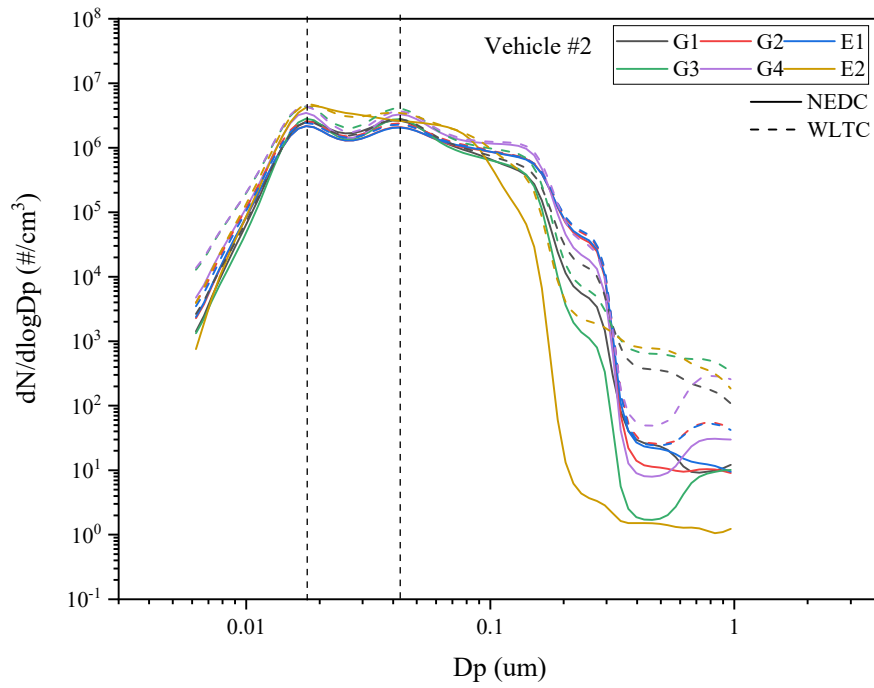

(b) Vehicle #2

**Figure S9.** The number concentration of particles with different particle sizes.

---

### 3.5. Matching of Vehicles and Fuels

**Table S1.** The area of each pentagon in the radar chart (Figure 9).

|    | Vehicle #1 |        | Vehicle #2 |        |
|----|------------|--------|------------|--------|
|    | NEDC       | WLTC   | NEDC       | WLTC   |
| G1 | 0.0704     | 0.0684 | 0.0585     | 0.0614 |
| G2 | 0.0706     | 0.0749 | 0.0714     | 0.0725 |
| E1 | 0.0571     | 0.0690 | 0.0912     | 0.0886 |
| G3 | 0.0743     | 0.0656 | 0.0552     | 0.0575 |
| G4 | 0.0664     | 0.0616 | 0.0596     | 0.0516 |
| E2 | 0.0574     | 0.0557 | 0.0598     | 0.0613 |
